# Supplementary material for: Syndemics of Fluoroquinolone Resistance in <em>N. gonorrhoeae</em>, <em>E. coli</em> and <em>K. pneumoniae</em>: A Global Ecological Analysis
Source: Preprints.org preprint supplement (doi:10.20944/preprints202108.0361.v1), 2021-08-17
Supplement: Supplementary file 1 [file supplementary]

Online supplementary file

Supplementary table 1: Sources used by CDDEP to provide antimicrobial resistance prevalence estimates. Results are provided by country.[1]

| Country | Data Source |
| --- | --- |
| Argentina | [WHONET-Argentina Network and SIREVAII-Argentina Network](https://resistancemap.cddep.org/Methodology.php#WHONET-Argentina%20Network%20and%20SIREVAII-Argentina%20NetworkResistanceSource) |
| Australia | [Australian Group of Antimicrobial Resistance (AGAR)](https://resistancemap.cddep.org/Methodology.php#Australian%20Group%20of%20Antimicrobial%20Resistance%20(AGAR)ResistanceSource) |
| Austria, Belgium, Bulgaria, Croatia, Cyprus, Czech Republic, Denmark, Estonia, Finland, France, Germany, Greece, Hungary, Iceland, Ireland, Italy, Latvia, Lithuania, Luxembourg, Malta, Netherlands, Norway, Poland, Portugal, Romania, Slovakia, Slovenia, Spain, Sweden, United Kingdom | [European Antimicrobial Resistance Surveillance Network (EARS-Net)](https://resistancemap.cddep.org/Methodology.php#European%20Antimicrobial%20Resistance%20Surveillance%20Network%20(EARS-Net)ResistanceSource) |
| Bahrain, Brazil, Cambodia, Egypt, Ethiopia, Indonesia, Iran, Japan, Jordan, Kosovo, Laos, Lebanon, Madagascar, Mali, Myanmar, Nepal, Nigeria, Oman, Philippines, Republic of Korea, Saudi Arabia, Sudan, Thailand, Tunisia, United Arab Emirates, Zambia | [Global Antimicrobial Resistance Surveillance System (GLASS)](https://resistancemap.cddep.org/Methodology.php#Global%20Antimicrobial%20Resistance%20Surveillance%20System%20(GLASS)ResistanceSource) |
| Belarus, Bosnia and Herzegovina, Georgia, Kosovo, Former Yugoslav Republic of Macedonia, Montenegro, Russia, Serbia, Switzerland, Turkey, Ukraine | [Central Asian and European Surveillance of Antimicrobial Resistance Network (CAESAR)](https://resistancemap.cddep.org/Methodology.php#Central%20Asian%20and%20European%20Surveillance%20of%20Antimicrobial%20Resistance%20Network%20(CAESAR)ResistanceSource) |
| Canada | [Canadian Antimicrobial Resistance Alliance (CARA)](https://resistancemap.cddep.org/Methodology.php#Canadian%20Antimicrobial%20Resistance%20Alliance%20(CARA)ResistanceSource) |
| Chile | [Chilean Society of Infectious Diseases](https://resistancemap.cddep.org/Methodology.php#Chilean%20Society%20of%20Infectious%20DiseasesResistanceSource) |
| China | [CHINET surveillance](https://resistancemap.cddep.org/Methodology.php#CHINET%20surveillanceResistanceSource) |
| Ecuador | [Reference Laboratory for Antimicrobial Resistance at the National Institute of Public Health Research (INSPI)](https://resistancemap.cddep.org/Methodology.php#Reference%20Laboratory%20for%20Antimicrobial%20Resistance%20at%20the%20National%20Institute%20of%20Public%20Health%20Research%20(INSPI)ResistanceSource) |
| Ghana, Zimbabwe | [Lancet Laboratories Pvt. Ltd](https://resistancemap.cddep.org/Methodology.php#Lancet%20Laboratories%20Pvt.%20LtdResistanceSource) |
| India | [SRL Diagnostics](https://resistancemap.cddep.org/Methodology.php#SRL%20DiagnosticsResistanceSource) |
| Kenya | [Private tertiary hospital](https://resistancemap.cddep.org/Methodology.php#Private%20tertiary%20hospitalResistanceSource) |
| Malawi | [Queen Elizabeth Central Hospital](https://resistancemap.cddep.org/Methodology.php#Queen%20Elizabeth%20Central%20HospitalResistanceSource) |
| Malaysia | [National Surveillance of Antimicrobial Resistance, Malaysia](https://resistancemap.cddep.org/Methodology.php#National%20Surveillance%20of%20Antimicrobial%20Resistance,%20MalaysiaResistanceSource) |
| Mexico | [Hospital Civil de Guadalajara "Fray Antonio Alcalde"](https://resistancemap.cddep.org/Methodology.php#Hospital%20Civil%20de%20Guadalajara) |
| New Zealand | [Public Health Surveillance](https://resistancemap.cddep.org/Methodology.php#Public%20Health%20SurveillanceResistanceSource) |
| Pakistan | [Chugtai's Laboratory Private Ltd.](https://resistancemap.cddep.org/Methodology.php#Chugtai's%20Laboratory%20Private%20Ltd.ResistanceSource) |
| South Africa | [South Africa Society for Clinical Microbiology](https://resistancemap.cddep.org/Methodology.php#South%20Africa%20Society%20for%20Clinical%20MicrobiologyResistanceSource) |
| Taiwan | [Taiwan Nosocomial Infection Surveillance (TNIS)](https://resistancemap.cddep.org/Methodology.php#Taiwan%20Nosocomial%20Infection%20Surveillance%20(TNIS)ResistanceSource) |
| United States of America | [The Surveillance Network (TSN)](https://resistancemap.cddep.org/Methodology.php#The%20Surveillance%20Network%20(TSN)ResistanceSource) |
| Venezuela | [Programa Venezolano de Vigilancia de la Resistencia a los Antimicrobianos (PROVENRA)](https://resistancemap.cddep.org/Methodology.php#Programa%20Venezolano%20de%20Vigilancia%20de%20la%20Resistencia%20a%20los%20Antimicrobianos%20(PROVENRA)ResistanceSource) |
| Vietnam | [Viet Nam Resistance (VINARES) Project](https://resistancemap.cddep.org/Methodology.php#Viet%20Nam%20Resistance%20(VINARES)%20ProjectResistanceSource) |

References

1. The Center for Disease Dynamics Economics & Policy. ResistanceMap: Antibiotic resistance. 2021 [cited 2021]. Available from: 2021. <https://resistancemap.cddep.org/AntibioticResistance.php>.
